# Supplementary material
Source: Springer Nature journal article supplement (https://www.springermedizin.de/resource/supplementary/12936_2009_1137_MOESM2_ESM.pdf/9549950)
Supplement: MOESM2 [file 9549950]

n=1401 patients

14 Day-  
trial 2003  
n=542

28-Day trial  
2005-2007  
n=859

Study I  
n=187

Study II  
n=176

Study III  
n=179

2005  
n=249

2006  
n=427

2007  
n=183

AQ, n=64\*\*  
62\*/63§+

AQ, n=58  
52/54

AQ, n=58  
57/58

Study I  
n=185

Study I  
n=136

AS-AQ  
73/81/92

SP, n=61  
53/61

SP, n=57  
48/53

SP, n=61  
52/57

AQ, n=64\*\*  
50\*/55§/59§+

AQ-SP, n=67  
55/62/62

DH-PP  
84/84/91

AQ-SP, n=62  
59/59

AQ-SP, n=61  
59/59

AQ-SP, n=60  
58/58

AS-AQ, n=60  
43/53/54

AS-MQ, n=69  
60/61/61

Study II §++  
n=64

Study II  
n=123

AS-AQ, n=62  
52/55/57

AS-AQ  
58/-/58

AM-LM, n=61  
58/60/60

Study III  
n=168

AS-CD, n=83  
53/60/71

AS-SP, n=85  
73/74/79
